# Supplementary material
Source: PubMed Central journal article supplement (PMC5597832)
Supplement: rspb20171157supp1.pdf [file rspb20171157supp1.pdf]

**Data Preparation**

GBIF Data (Eurasia)

eBIRD Data (North America)

a. Data Cleaning

Native Range

Removal of records:

- extralimital to reported observation date
- before 1970
- with no date or lat-lon data
- with no lat/lon =0
- with obvious geographic inaccuracies

Invasive Range

Removal of records:

- extralimital to reported observation date
- before 1970
- with no date or lat-lon data
- with no lat/lon =0
- outside USA and Canada
- with obvious geographic inaccuracies

Filter traveling counts to  $\leq 20\text{km}$

c. Data Balancing

Reduce record density to  $\leq 25$  records/ $10^6$  km<sup>2</sup> per country

Balanced Data

b. Account for Sampling Bias

Count records per pixel

Raw bias → Ln bias

Thinned Data

Final data on invasive populations for overlay

d. Data Subsetting for Calibration and Evaluation

50% calibration      50% evaluation

1 2 3 4 5      1 2 3 4 5

Maxent and MVE models

Best model from calibration in Eurasia

Test of relationship between model predictions and real invasion progress

**Analysis and Interpretation**

## Summary of Principal Component Analysis Results

We created this analysis on a global scope, and based on variables 1-7 and 10-17 from the bioclimatic variables provided in the WorldClim climate data archive ([www.worldclim.org](http://www.worldclim.org)). These

### Variance explained:

|                        | PC1    | PC2    | PC3     | PC4     | PC5     |
|------------------------|--------|--------|---------|---------|---------|
| Standard deviation     | 2.8443 | 1.9873 | 1.09497 | 0.93816 | 0.66159 |
| Proportion of variance | 0.5393 | 0.2633 | 0.07993 | 0.05868 | 0.02918 |
| Cumulative proportion  | 0.5393 | 0.8026 | 0.88257 | 0.94125 | 0.97043 |

### Factor loadings:

| Bioclimatic variable | Definition                           | PC1    | PC2    | PC3    | PC4    | PC5    |
|----------------------|--------------------------------------|--------|--------|--------|--------|--------|
| bio1                 | Annual mean temperature              | 0.329  | -0.154 | -0.120 | -0.028 | 0.141  |
| bio2                 | Mean diurnal range                   | 0.116  | -0.374 | -0.101 | -0.375 | -0.473 |
| bio3                 | Isothermality                        | 0.324  | -0.020 | -0.016 | 0.119  | -0.333 |
| bio4                 | Temperature seasonality              | -0.323 | -0.023 | 0.058  | -0.385 | 0.138  |
| bio5                 | Maximum temperature of warmest month | 0.255  | -0.278 | -0.153 | -0.344 | 0.266  |
| bio6                 | Minimum temperature of coldest month | 0.340  | -0.068 | -0.117 | 0.157  | 0.102  |
| bio7                 | Temperature annual range             | -0.302 | -0.110 | 0.055  | -0.485 | 0.051  |
| bio10                | Mean temperature of warmest quarter  | 0.277  | -0.240 | -0.144 | -0.280 | 0.313  |
| bio11                | Mean temperature of coldest quarter  | 0.339  | -0.098 | -0.104 | 0.123  | 0.056  |
| bio12                | Annual precipitation                 | 0.232  | 0.347  | 0.180  | -0.196 | 0.033  |
| bio13                | Precipitation of wettest month       | 0.246  | 0.224  | 0.472  | -0.172 | 0.135  |
| bio14                | Precipitation of driest month        | 0.101  | 0.413  | -0.327 | -0.252 | -0.288 |
| bio15                | Precipitation seasonality            | 0.095  | -0.320 | 0.493  | -0.034 | -0.503 |
| bio16                | Precipitation of wettest quarter     | 0.245  | 0.242  | 0.446  | -0.173 | 0.135  |
| bio17                | Precipitation of driest quarter      | 0.113  | 0.415  | -0.309 | -0.247 | -0.260 |

Supplementary Figures

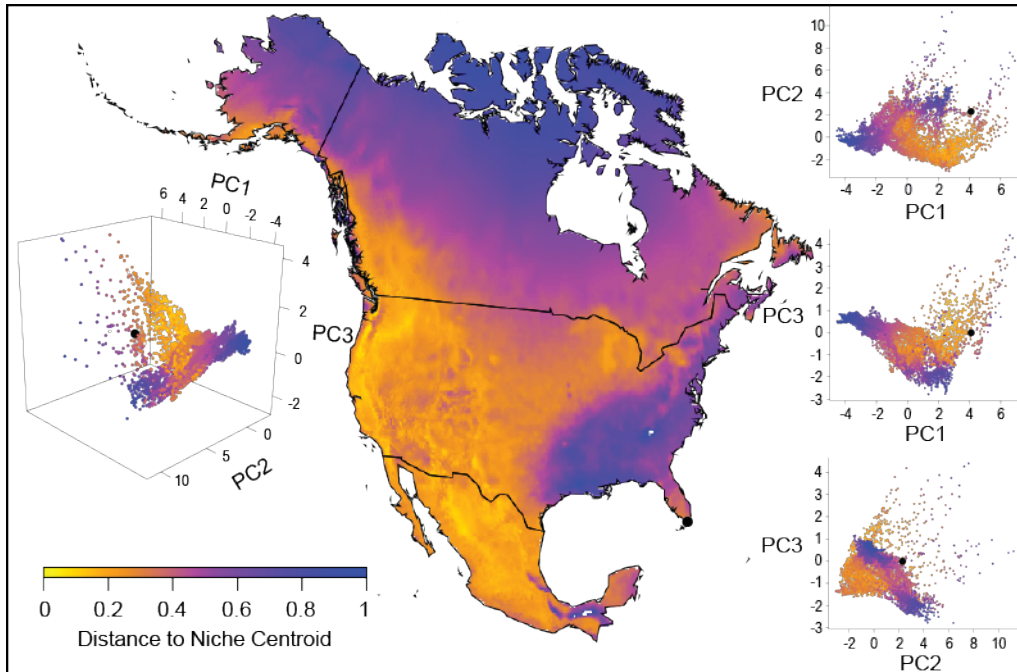

**Fig S1** Median projection and visualizations in North America of the best MVE model (balanced occurrence data, no bias layer) based on an adjusted least training presence threshold ( $E = 5\%$ ). (a) Projected environmental suitability. Environmental distance from calculated niche centroid is displayed on a continuous gradient scale, after standardizing and subtracting from unity. Visualizations in environmental space: 3-dimensional and 2-dimensional plots. Projection: North America Lambert Conformal Conic.

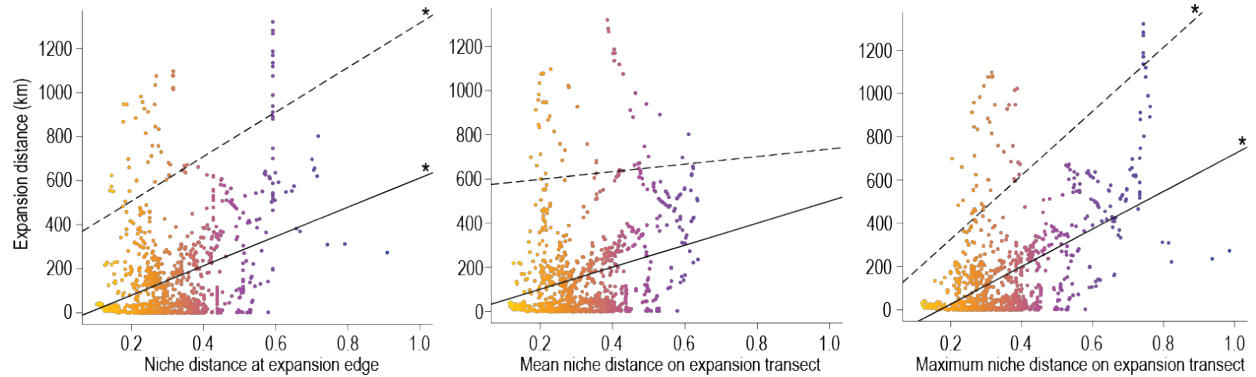

**Fig S2** Plots of simple linear (black lines) and 5% quantile (dashed lines) regressions of the best MVE model (balanced occurrence data, no bias layer) for distance from niche centroid to expansion edge for (a) raw and (b) thinned data, and mean distance traveled from last expansion with (c) raw and (d) thinned data. Color ramp is identical to Figure S1. Asterisk (\*) denotes significance.
